# Supplementary material
Source: Springer Nature journal article supplement (https://www.springermedizin.de/resource/supplementary/13256_2011_1939_MOESM1_ESM.pdf/9648840)

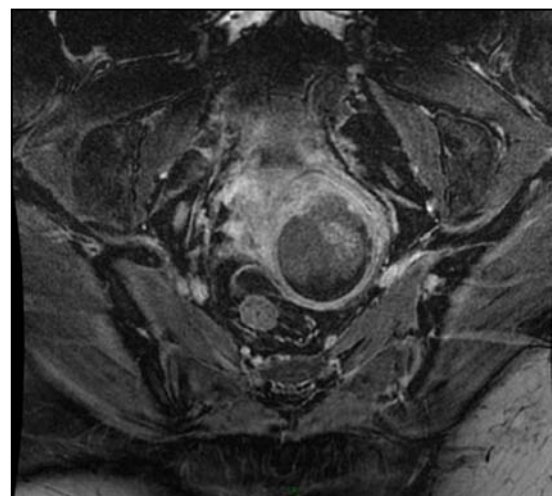

A

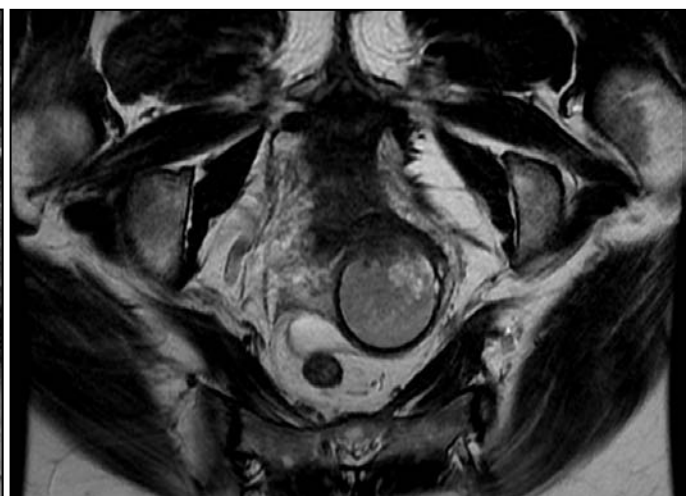

B

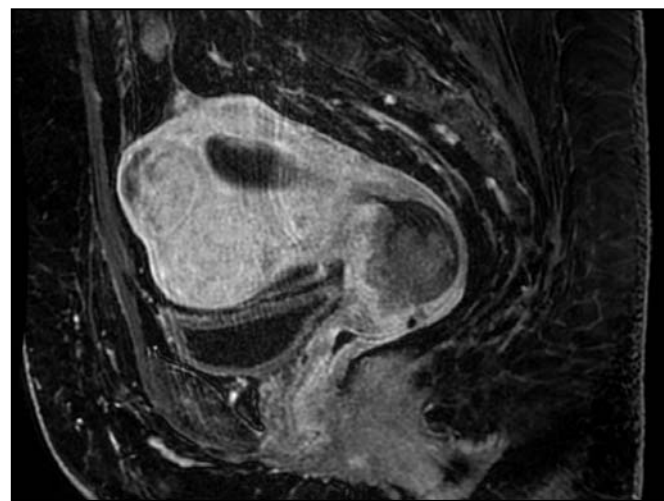

C

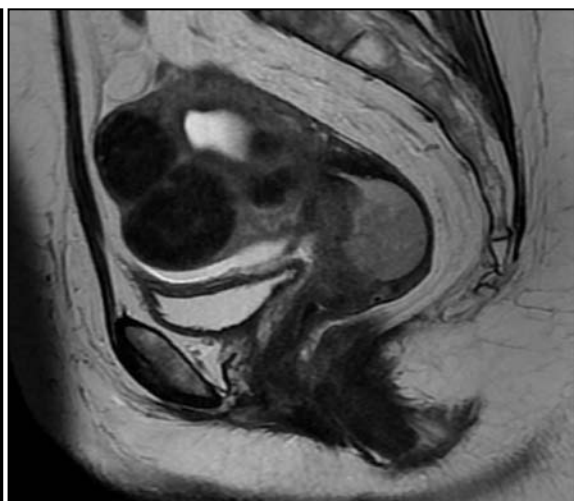

D

Supplement: MOESM1 [file 9648840]
